## RESEARCH ARTICLE

# Analysis of body heat tolerance of workers in a simulated warm environment based on linear mixed model

Mohsen Aliabadi<sup>1</sup>\*, Masoud Shafiee Motlagh<sup>1\*</sup>, Rostam Golmohammadi<sup>2</sup>, Rashid Heidarimoghadam<sup>3</sup>, Maryam Farhadian<sup>4</sup>

**1** Center of Excellence for Occupational Health, Occupational Health and Safety Research Center, Hamadan University of Medical Sciences, Hamadan, Iran, **2** Center of Excellence for Occupational Health, Research Center for Health Sciences, Hamadan University of Medical Sciences, Hamadan, Iran, **3** Department of Ergonomics, Research Center for Health Sciences, Hamadan University of Medical Sciences, Hamadan, Iran, **4** Department of Biostatistics, Researches Center for Health Sciences, School of Public Health, Hamadan University of Medical Sciences, Hamadan, Iran

\* These authors contributed equally to this work.

\* [M.shafiee@umsha.ac.ir](mailto:M.shafiee@umsha.ac.ir), [Shafiee.ohe@gmail.com](mailto:Shafiee.ohe@gmail.com)

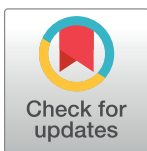

## OPEN ACCESS

**Citation:** Aliabadi M, Shafiee Motlagh M, Golmohammadi R, Heidarimoghadam R, Farhadian M (2022) Analysis of body heat tolerance of workers in a simulated warm environment based on linear mixed model. PLoS ONE 17(12): e0279170. <https://doi.org/10.1371/journal.pone.0279170>

**Editor:** Adam W. Potter, US Army Research Institute of Environmental Medicine, UNITED STATES

**Received:** August 12, 2021

**Accepted:** November 21, 2022

**Published:** December 22, 2022

**Copyright:** © 2022 Aliabadi et al. This is an open access article distributed under the terms of the [Creative Commons Attribution License](https://creativecommons.org/licenses/by/4.0/), which permits unrestricted use, distribution, and reproduction in any medium, provided the original author and source are credited.

**Data Availability Statement:** All relevant data are within the paper and its [Supporting Information](#) files.

**Funding:** The study was funded by Vice-chancellor for Research and Technology, Hamadan University of Medical Sciences (No. 9412046832). The funder provided support in the form of salaries for authors, but did not have any additional role in the

## Abstract

Workers' heat tolerance plays a crucial role in maintaining their health and performance in hot environments. This study aimed to empirically analyze the body heat tolerance of workers under a simulated warm environment. Twenty healthy male workers from the typical light metal industry (age:  $23.15 \pm 2.45$  years) were participated in the experimental study. Workers were exposed to two thermal environments ( $T_a = 22^\circ\text{C}$ ,  $\text{RH} = 35\%$ , and  $T_a = 35^\circ\text{C}$ ,  $\text{RH} = 35\%$ ) in a simulated moderate workload in a climate-controlled room. The maximal aerobic capacity ( $\text{VO}_2 \text{ max}$ ) and body fat mass of workers were determined. The heat tolerance indicators were determined based on heart rate (HR) and ear temperature (ET) before and after each experiment. A linear mixed model was employed to analyze body heat tolerance indicators using the SPSS statistical package. All physiological responses significantly increased in the warm air condition compared to the thermoneutral condition. The HR and ET increased by an average of 14 bpm and  $0.75^\circ\text{C}$ , respectively ( $p < 0.05$ ). The mixed model could accurately predict heat tolerance indicators ( $r = 0.95$  and  $r = 0.97$ ) so that the  $\text{VO}_2 \text{ max}$  and body fat mass were identified as the main individual influential factors. The  $\text{VO}_2 \text{ max}$  showed significant correlation with urinary specific gravity ( $r = -0.55$ ,  $p < 0.05$ ), HR ( $r = -0.59$ ,  $p < 0.05$ ), and ET ( $r = -0.57$ ,  $p < 0.05$ ) in warm environment. The model confirmed that physical fitness is critical in increasing heat tolerance in warm environments. It can be a helpful screening tool for properly selecting workers in occupational medical examinations for working in warm air conditions. It is proposed that workers' regular exercise and lifestyle modifications can strengthen their heat tolerance.

## 1 Introduction

Exposure to warm air conditions in the workplace can directly or indirectly affect employees' physiological responses, such as body temperature, metabolism rate, heart rate (HR), and

study design, data collection and analysis, decision to publish, or preparation of the manuscript.

**Competing interests:** The authors have declared that no competing interests exist.

blood pressure [1–3]. It can cause heat-related illnesses, including heat exhaustion, muscle cramps, heatstroke, heat rashes, and neuropsychiatric disorders [3–5]. Reduced work performance caused by heat stress also increased the rate of human errors and accidents in the workplace [3, 6–10]. Moreover, the most dangerous consequence of overexposure to heat in the workplace is heatstroke, leading to death in more severe cases [3, 11].

The main factors are effective in causing heat strain, including essential environmental factors, such as ambient air temperature, radiant air temperature, air velocity, relative humidity (RH), and underlying personal characteristics, such as age, weight, acclimatization level, metabolism rate, and health status [3, 12–14]. In addition to the aforementioned environmental and underlying factors, some secondary body physical factors may affect the level of body heat tolerance. The most critical factors include body fat mass, body volume to surface ratio, physical fitness, and maximal aerobic capacity (a cardiopulmonary index of maximal oxygen uptake) [1, 3, 15, 16]. Maximal aerobic capacity (also known as  $VO_2$  max or peak oxygen uptake) indicates the maximum rate of oxygen transport to the muscles. It depends on cardiac output and oxygen used by the muscles [17, 18]. The maximal aerobic capacity is frequently used to measure the fitness of the cardiorespiratory system [3, 15, 19, 20].

Some researchers practiced the protocol for the determination of body heat tolerance. Moran et al. showed the applicability of the heat tolerance test (HTT) as a relatively accurate screening tool in identifying individuals' tolerance/intolerance to heat [21]. HTT has defined human exposure to thermal air conditions in a climatic chamber while walking on a treadmill dressed in light cloth. This way, the heat strain indicators such as body temperature and heart rate are continuously monitored [21]. The experiment study on thermal comfort and body heat tolerance is frequently employed to investigate cognitive and physiological responses to different thermal conditions in diverse populations [22–24]. Lu et al. studied different people's body's physiological responses to heat in three climate conditions: warm-dry, warm-humid, and mild air temperatures. They found that  $VO_2$  max and weight significantly affect the body's physiological response to subjects' exposure to heat [16]. Havenith et al. showed that individual characteristics play a significant role in determining the responses of body core temperature in all studied environments [25]. Lisman et al. studied the relationship between heat intolerance and body anthropometric dimensions and fitness. They indicated that  $VO_2$  max was the most influential factor in heart rate and core body temperature during the heat tolerance test [26]. Mee et al. found that some variables of body mass index, HR,  $VO_2$  max, rectal temperature, and ST can be considered the most influential variables in the heat tolerance level [27]. Some studies have demonstrated that individuals with a lower  $VO_2$  max have a reduced ability to thermoregulate relative to individuals with a higher  $VO_2$  max during exercise scenarios [28, 29].

It seems that prediction models for analyzing the body responses in any climatic conditions are most helpful in implementing effective preventive measures. Statistical modeling provides one of the best solutions to tackle these complex phenomena. Linear mixed models (LMMs) are increasingly used for data analysis in various physical, biological, and social disciplines [30–35]. However, few studies reported using these statistical approaches to predict thermal strain [32, 33, 35].

Moreover, most of the aforementioned studies about the analysis of heat tolerance were conducted on athletes and the military population, whose individual characteristics and nature of activities are different from the working environment. There is a dearth of studies on the effects of these underlying factors on the thermal comfort of workers in warm working environments. An essential measure in preventing heat strain in warm workplaces is the proper selection of workers in medical examinations [36]. In this regard, explaining the role and effects of the different influential risk factors on body heat tolerance can facilitate selecting

workers appropriate to working climate conditions. This study aimed to empirically analyze the body heat tolerance of workers under a warm environment based on a linear mixed model.

## 2 Materials and methods

### 2.1 Participants

Twenty healthy male workers from the typical light metal industries of Hamadan city (located in the west of Iran) were selected. The workers with a history of smoking, diabetes, hypertension, hyperthyroidism, cardiovascular disease, kidney disease, sleep disorders, and heat-related illnesses were excluded from the study. They were recommended not to use caffeine or other stimulants 12 hours before the experiments. This study was approved by the Ethics Committee of Hamadan University of Medical Sciences (ethic code: IR.UMSHA.REC.1394.439). All methods were performed according to the guidelines and regulations approved by the Hamadan University of Medical Sciences Ethics Committee. After being informed about this research, written consent was obtained from the participants, which the ethics committee approved. They were also informed of the aim and method of the study. If the body temperature reaches more than 38.5 degrees Celsius, the person feels dizzy, nauseous, or weak, or the heart rate reaches the maximum threshold according to Eq (1), the experiments will be stopped [3, 37].

$$HR_{max} = 180 - age \quad (1)$$

Where  $HR_{max}$  is the maximum threshold of heart rate (bpm), age is the person's age (years)

### 2.2 Experiment setup

The experiment was carried out using a within-participants design, where all participants were tested under two experimental environments, thus acting as their own controls. The flowchart of different steps of the experiments is presented in Fig 1.

The experimental environment was a climate-controlled room with dimensions of  $L \times W \times H = 3.70 \times 2.40 \times 2.70$  m. It was possible to set and fix the chamber's thermal environments using an air-conditioner system within  $-10$  to  $50^\circ\text{C}$  and relative humidity of at least up to 90%. It is equipped with an automatic air oxygen regulation system. The room has two LED lamps which provide a luminance of 300 lux. Fig 2 displays the climate-controlled room. During the experiment, the thermometer sensors installed on the room's wall continuously monitored the thermal environments, including air temperature and relative humidity.

The participants were exposed to two conditions of thermal environments simulated in the climate-controlled room: thermoneutral ( $T_a = 22^\circ\text{C}$ ,  $\text{RH} = 30\%$ ) and warm ( $T_a = 35^\circ\text{C}$ ,  $\text{RH} = 35\%$ ). In both environments inside the climate-controlled room, a treadmill (Elite T5, Horizon) was used to simulate a moderate workload ( $130\text{--}200 \text{ w/m}^2$ ) with a treadmill speed of  $3.5 \text{ km/h}$  with a slope of 2% [38]. The participants were walked on a treadmill for 30 minutes in each environment. Furthermore, the clothes thermal insulation of the participants was maintained at 0.75 clo by the recommended ISO 9920:2007 standard [39].

### 2.3 Maximal oxygen uptake ( $\text{VO}_2 \text{ max}$ )

The step test was used to determine the maximal oxygen uptake ( $\text{VO}_2 \text{ max}$ ) of participants according to the standards proposed by the American College of Sports Medicine (ACSM) [40]. For this purpose, the subject had to go up and down 40 cm-high stairs in 3 minutes; then, the frequency of going up and down the stairs per minute was obtained. Subsequently,  $\text{VO}_2 \text{ max}$  was calculated and expressed in units of liters (l) of  $\text{O}_2$  per minute (min) using

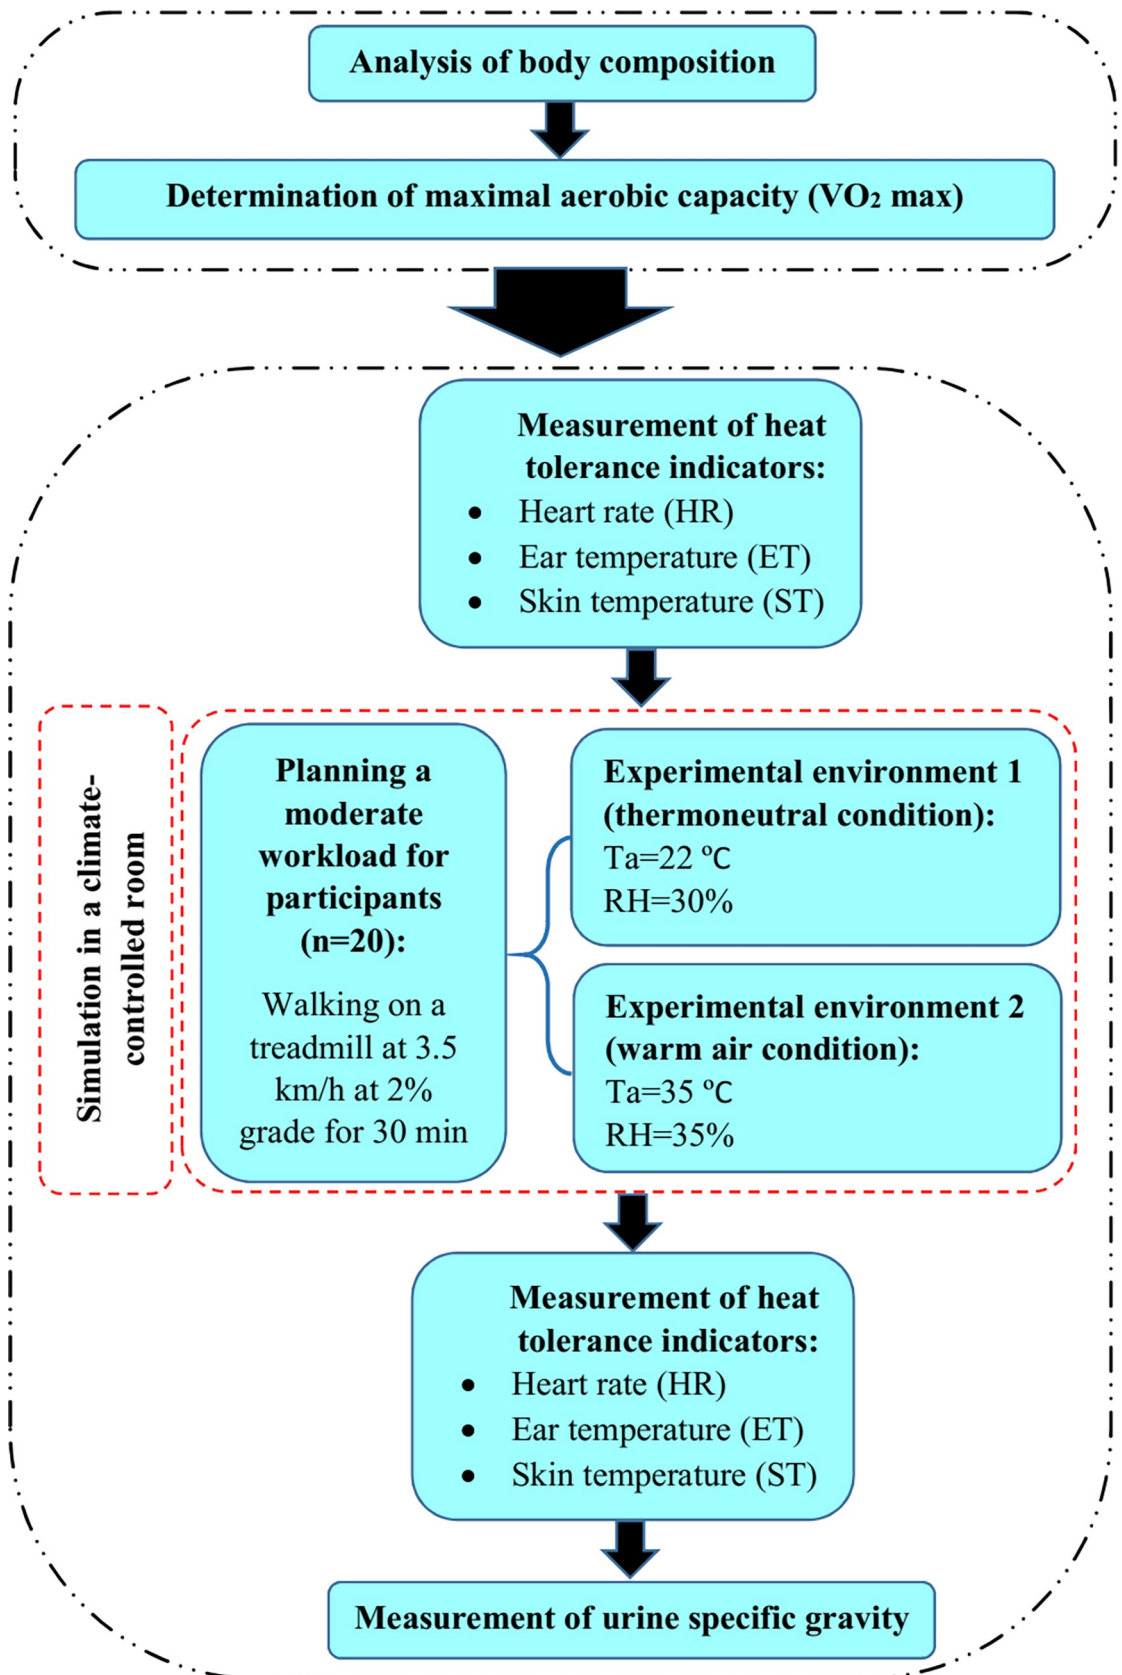

Fig 1. The flowchart of different steps of the experiments.

<https://doi.org/10.1371/journal.pone.0279170.g001>

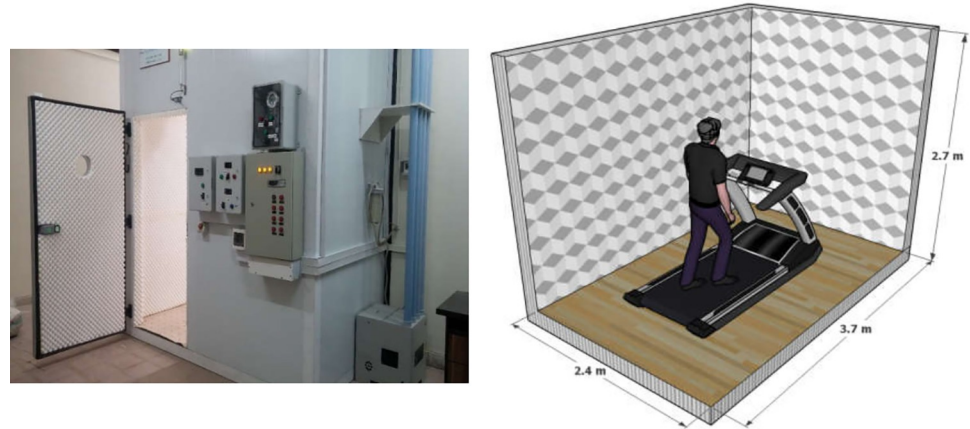

**Fig 2. Climate-controlled room for experiments.**

<https://doi.org/10.1371/journal.pone.0279170.g002>

participants' weights in kilograms and HR measured immediately after the test based on Eq (2).

$$VO_{2\max} = \frac{AG(131.5 \times VO_2)}{HR + GF - 72} \quad (2)$$

Where  $VO_2$  max is the maximal oxygen uptake (l/min),  $VO_2$  is the oxygen consumption at a steady-state (l/min), HR is the heart rate (bpm), GF is the sex factor (for men ten and women zero), AG is the age correction factor that was calculated by Eq (3),

$$AG = 1.12 - 0.0073 \text{ age} \quad (3)$$

Where age is the person's age (years),

$$VO_2 = (0.35 \times f) + (2.395 \times f \times h) \quad (4)$$

Where f is the frequency of going up and down the steps (step per minute), h is the step height (m), and  $VO_2$  is the oxygen consumption at a steady-state (ml/kg/min).

## 2.4 Body composition analysis

Body fat and muscle masses were measured using a body composition analyzer (N20, AIIA Communications Inc). Moreover, the hydration status of the participants must be the same for two experiment sessions. In this way, the participants' urine specific gravity (USG) was measured and recorded in each experiment scenario using a digital refractometer (PAL-10S, Atago, Japan). The experiment session was cancelled if the subject's hydration level was unusual. USG is widely accepted as a convenient and reliable indicator of hydration status [3, 41–44].

## 2.5 Body heat tolerance indicators

According to the recommended ISO 9886:2004 standard [43], participants' physiological responses, including heart rate (HR), ear temperature (ET), and skin temperature (ST), were measured before and after walking on a treadmill to determine their heat tolerance. The subjects' ET was measured with an ear thermometer (TH839S; OMRON Instruments). The main reason for selecting ET to represent body temperature was the simple measurement of ET using an accurate and non-invasive thermometer [45]. It should be noted that the invasive



measurement of body temperature indicators, such as the rectal temperature, can lead to participants leaving the study.

For measuring ST (forehead temperature), an infrared thermometer (TG165; FLIR Instruments) was used. The subjects' heart rate was measured using a monitor device (E600; POLAR Instruments). This device had a sensor mounted on the chest and a display placed on a wrist strap. The sensor communicated with the display via Bluetooth and showed the heart rate. All physiological responses were measured three times in each step, and their mean was recorded for each measurement. It is noteworthy that before the commencement of the treadmill test, participants sat quietly on a chair for 15 minutes and drank 250cc of water at room air temperature to keep the standard baseline heart rate.

## 2.6 Statistical analysis

Data normality was tested using the Kolmogorov-Smirnov test. When data were normally distributed, they were analyzed using the paired-sample and student T-tests. The significant relation among some features was analyzed using Pearson correlation. Wilcoxon's tests will consider when the data distribution is not normal. The significant level for all tests was set at 5%. The linear mixed model (LMM) was also run to evaluate different influential risk factors on heat tolerance indicators such as heart rate and ear temperature. LMM describes the relationship between a response variable and other explanatory variables that have been obtained along with the response [30, 31]. In these analyses, the participant was added to the model as a random variable for grouping the data for each participant to show that the same participant was measured several times. This means that the intercept is a random variable rather than a constant one, i.e., the intercept varies between the participants [34]. Data were analyzed in SPSS software (ver.22, Chicago, IL, USA).

## 3 Results

The results of the demographic and body characteristics of the participants are presented in Table 1. The results showed that the mean BMI of the participants is approximately in the normal range.

### 3.1 Results of the heat tolerance indicators

Table 2 presented the body's physiological responses before and after walking on a treadmill in thermoneutral and warm conditions. It can be seen that, in the warm air condition, the mean HR, ET, and ST were significantly higher than in the thermoneutral condition ( $p < 0.05$ ). There was no significant difference between the baseline HR before walking on a treadmill in thermoneutral and warm conditions ( $p = 0.154$ ). Based on the guidelines for interpreting

**Table 1. Demographic and body characteristics of the participants (n = 20).**

| Variable                             | Mean $\pm$ SD     | Min   | Max   |
|--------------------------------------|-------------------|-------|-------|
| Age (yrs)                            | 23.15 $\pm$ 2.45  | 20.00 | 26.00 |
| Height (m)                           | 1.77 $\pm$ 0.05   | 1.69  | 1.89  |
| Weight (kg)                          | 70.75 $\pm$ 11.99 | 48.00 | 98.40 |
| Body mass index (kg/m <sup>2</sup> ) | 22.39 $\pm$ 3.20  | 16.4  | 28.38 |
| Muscle mass (kg)                     | 53.40 $\pm$ 7.10  | 44.50 | 71.30 |
| Body fat mass (kg)                   | 13.80 $\pm$ 6.10  | 2.00  | 24.00 |
| Vo <sub>2</sub> max (lit/min)        | 2.13 $\pm$ 0.40   | 1.40  | 2.82  |

<https://doi.org/10.1371/journal.pone.0279170.t001>

**Table 2. Participants' physiological responses before and after walking on a treadmill in thermoneutral and warm conditions.**

| Variable              | Thermoneutral condition |                | Warm air condition |                |
|-----------------------|-------------------------|----------------|--------------------|----------------|
|                       | Mean ± SD               |                | Mean ± SD          |                |
|                       | Baseline                | After activity | Baseline           | After activity |
| Heart rate (bpm)      | 70 ± 13.16              | 113.30 ± 13.20 | 65 ± 15.20         | 122.15 ± 15.27 |
| Skin temperature (°C) | 33.68 ± 1.53            | 33.87 ± 1.55   | 35.12 ± 0.89       | 35.84 ± 0.89   |
| Ear temperature (°C)  | 34.98 ± 0.56            | 35.40±0.60     | 35.64 ± 0.27       | 36.81 ± 0.29   |

<https://doi.org/10.1371/journal.pone.0279170.t002>

urine-specific gravity readings, the participants have marginally adequate hydration in two air conditions (USG = 1.02±0.01).

**Table 3** presented the pre-post change in body physiological responses before and after walking on a treadmill in thermoneutral and warm conditions. It can be seen that the HR and ST of the participants exposed to the warm air-condition increased by an average of 14 bpm and 0.75°C, respectively.

Figs 3 and 4 illustrated the significant correlation between one of the primary individual risk factors, VO<sub>2</sub> max, and some important physiological responses (HR and ET) in a warm air condition. The Pearson test showed that the ET difference before and after walking on a treadmill was significantly correlated with VO<sub>2</sub> max ( $r = -0.57, p < 0.05$ ). There was also a significant correlation between VO<sub>2</sub> max and HR difference in the warm air condition ( $r = -0.59, p < 0.05$ ).

Pearson's test showed that VO<sub>2</sub>max was significantly negatively correlated with the urinary density of participants in the warm air condition ( $r = -0.55, p < 0.05$ ). **Fig 5** showed the correlation between VO<sub>2</sub> max and urine-specific gravity of participants in warm air condition.

### 3.2 Results of the LMM model

**Table 4** presented the results of the developed linear mixed-effects model for the analysis of heat tolerance indicators. The model showed the effect sizes of main individual characteristics and thermal air condition on heat tolerance indicators. The developed model's main input variables include BMI (in two levels of normal and abnormal), air temperature (in two levels of thermoneutral and warm air conditions), VO<sub>2</sub> max, and body fat mass. The main output variables of the developed model are the primary heat tolerance indicators as HR and ET. The thermal air condition had the most significant effect on heat tolerance indicators, including HR and ET. The workers' VO<sub>2</sub> max and body fat mass was also identified as the main influential individual factors in HR. BMI had no significant effect on the body's physiological responses of workers exposed to the thermal condition.

Figs 6 and 7 showed the measured values compared to the predicted values based on LMM for ET and HR. Based on the marginal(Nakagawa), the results confirmed the good performance of the developed LMM for predicting body heat tolerance indicators( $R^2 = 0.63$  and 0.685).

**Table 3. The physiological response pre-post change before and after walking on a treadmill in thermoneutral and warm conditions.**

| Variable             | Thermoneutral condition | Warm air condition | p-value |
|----------------------|-------------------------|--------------------|---------|
|                      | Mean ± SD               | Mean ± SD          |         |
| Heart rate (bpm)     | 43.3±13.20              | 57.15±15.27        | <0.01   |
| Ear temperature (°C) | 0.42±0.2                | 1.17±0.33          | <0.01   |

<https://doi.org/10.1371/journal.pone.0279170.t003>

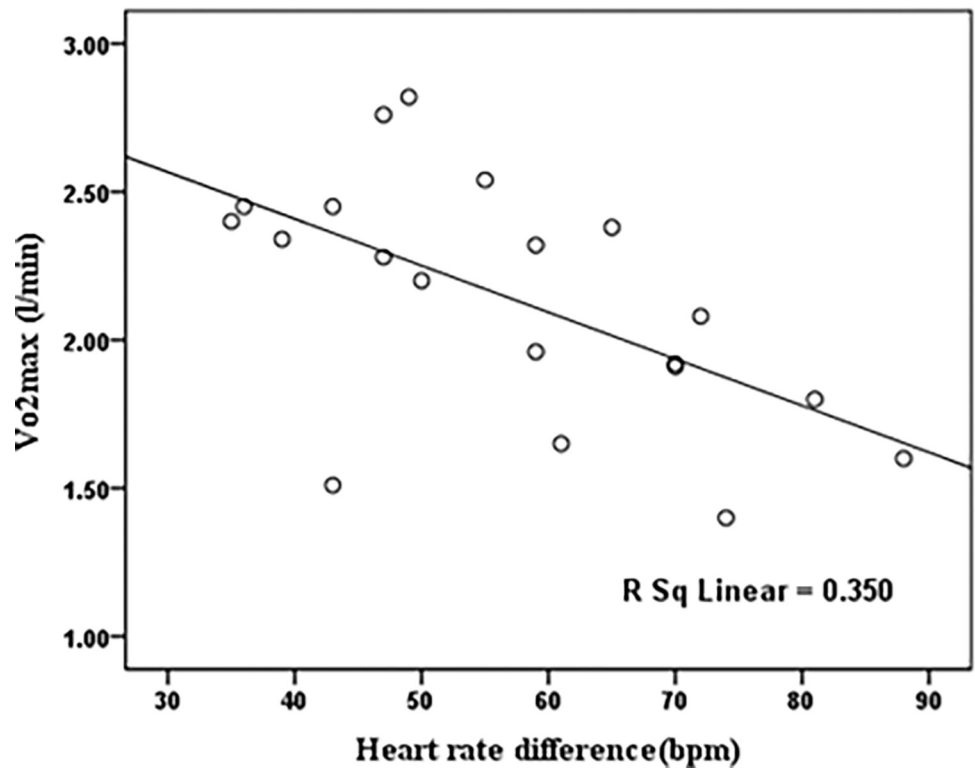

Fig 3. The scatter plots of the VO<sub>2</sub> max compared to heart rate difference before and after walking on a treadmill in the warm air condition.

<https://doi.org/10.1371/journal.pone.0279170.g003>

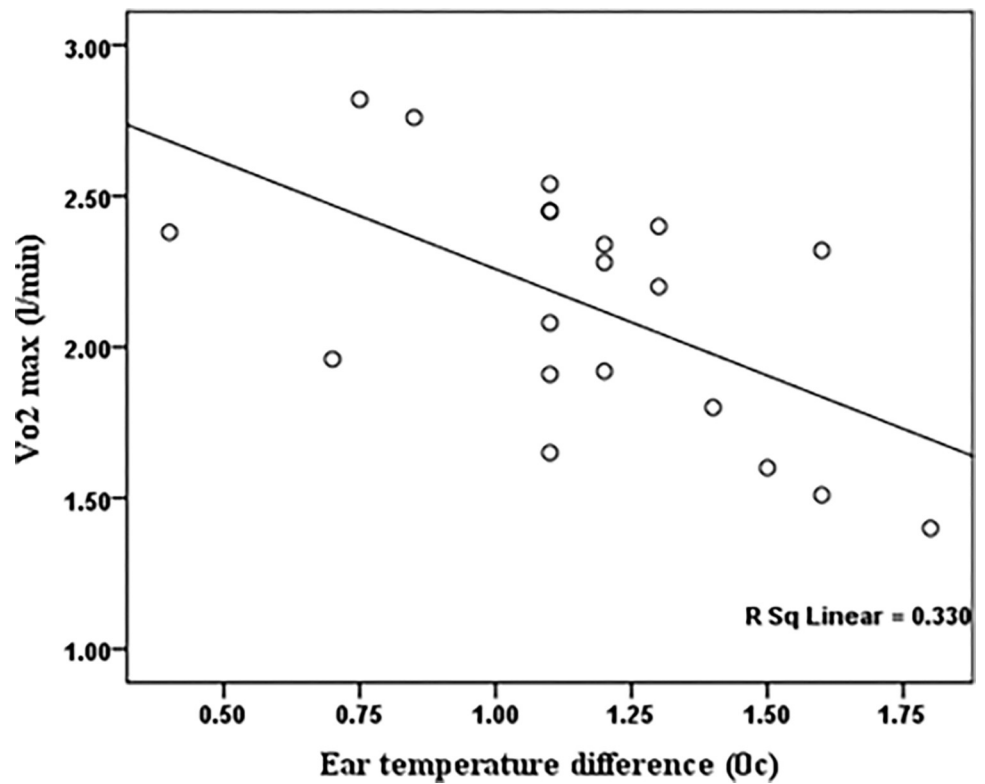

Fig 4. The scatter plots of the VO<sub>2</sub> max compared to the ear temperature difference before and after walking on a treadmill in the warm air condition.

<https://doi.org/10.1371/journal.pone.0279170.g004>



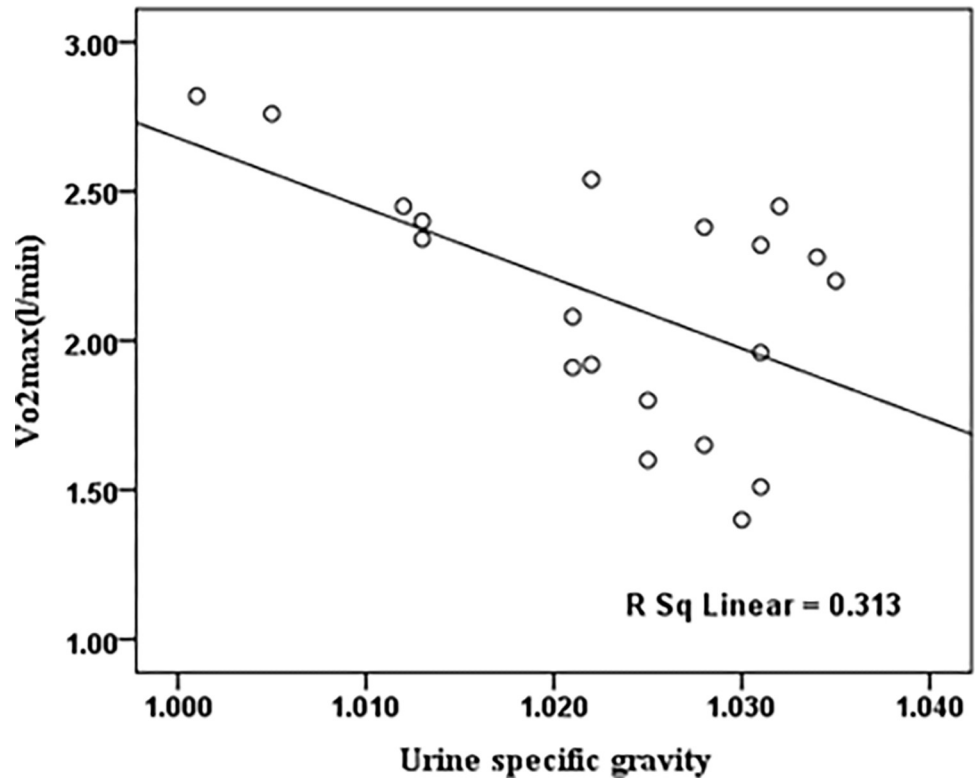

Fig 5. The scatter plots of the VO<sub>2</sub> max compared to urine-specific gravity in the warm air condition.

<https://doi.org/10.1371/journal.pone.0279170.g005>

### 4 Discussion

The current study investigated the effect of different influential risk factors on the body heat tolerance of workers exposed to a simulated warm working environment. Our results demonstrated that the heat tolerance indicators, including HR, ET, and ST, increased significantly in the warm air condition compared to the thermoneutral condition. According to the results of

Table 4. The LMM model for analyzing the effects of body characteristics on heat tolerance indicators.

|                       | Predictors                         | Description             | Heart rate    |         | Ear temperature |         |
|-----------------------|------------------------------------|-------------------------|---------------|---------|-----------------|---------|
|                       |                                    |                         | Estimate ± SE | p-value | Estimate ± SE   | p-value |
| <b>Fixed Effects</b>  | Intercept                          |                         | 187.39±18.03  | <0.001  | 38.49±0.96      |         |
|                       | Air temperature                    | Warm (35°C)             | 9.11±1.58     | <0.001  | 1.36±0.10       | <0.001  |
|                       |                                    | Thermoneutral (22°C)    | Reference     | -       | Reference       | -       |
|                       | BMI                                | Abnormal (<18.5, >24.9) | -0.42±4.34    | 0.92    | -0.06±0.22      | 0.79    |
|                       |                                    | Normal (18.5 to 24.9)   | Reference     | -       | Reference       | -       |
|                       | Vo <sub>2</sub> max                | (l/min)                 | -23.58±5.29   | <0.001  | -0.22±0.27      | 0.43    |
|                       | Body fat mass                      | Kg                      | 1.25±0.32     | <0.001  | 0.00±0.01       | 0.64    |
| <b>Random Effects</b> |                                    |                         |               |         |                 |         |
|                       |                                    | Variance (SD)           |               |         | Variance (SD)   |         |
|                       | Subjects (Intercept)               | 58.83 (7.67)            |               |         | 0.144 (0.379)   |         |
|                       | Residual                           | 26.46 (5.14)            |               |         | 0.112 (0.335)   |         |
|                       | Marginal R <sup>2</sup> (Nakagawa) | 0.63                    |               |         | 0.685           |         |

<https://doi.org/10.1371/journal.pone.0279170.t004>

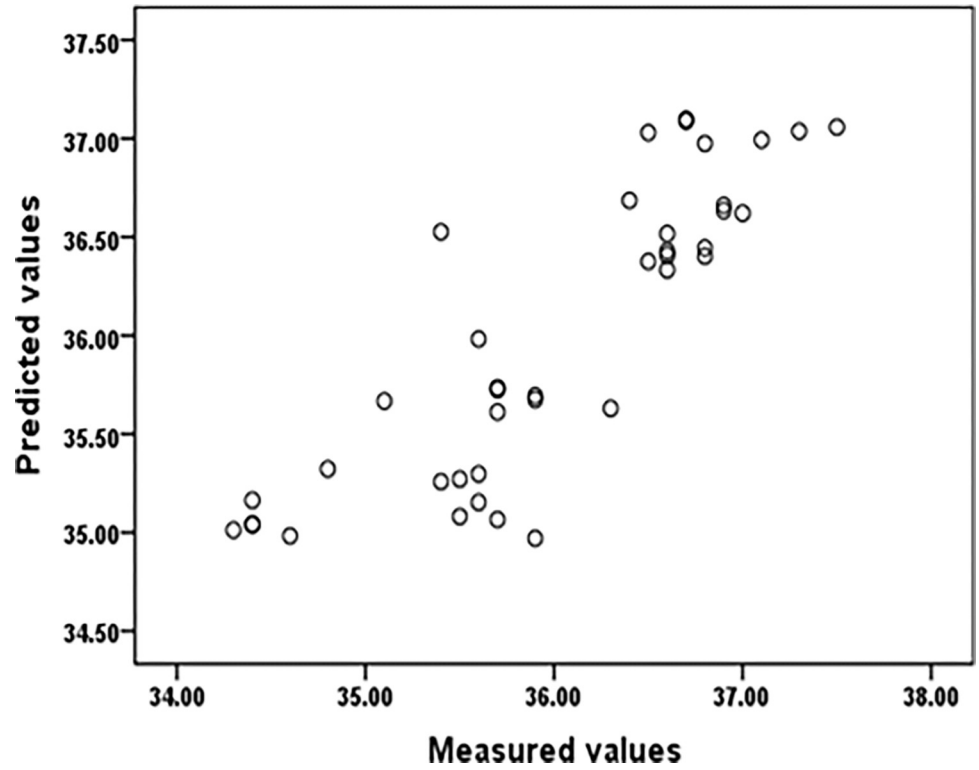

Fig 6. The ear temperature (ET) measured values compared to the predicted values based on LMM.

<https://doi.org/10.1371/journal.pone.0279170.g006>

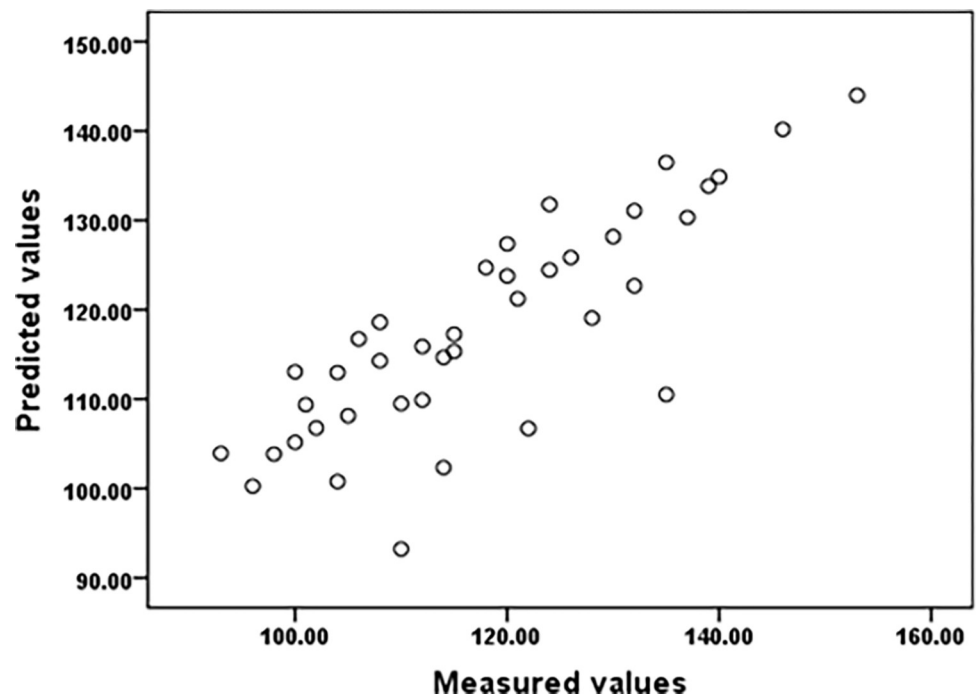

Fig 7. The heart rate (HR) measured values compared to the predicted values based on LMM.

<https://doi.org/10.1371/journal.pone.0279170.g007>

the LMM model, the air temperature had the most significant effect on body physiological responses, including HR and ET. It is noteworthy that considering the same workload (moderate working metabolism) in both thermoneutral and warm conditions, the HR of subjects exposed to warm air conditions increased by an average of 14 bpm. As a result, participants experienced light cardiovascular strain, which should be considered by occupational hygienists to monitor the health of workers exposed to heat in typical light metal industries and similar industries.

Moreover, the ET of participants exposed to warm air conditions increased by an average of 0.75°C. According to ISO 9886, the limit value of the physiological thermal strain for workers was determined body temperature increase by about one degree Celsius in less than one hour. In the present study, during the 30 min exposure of workers to heat, their body temperature increased by an average of 0.75°C, that this important finding should be considered by occupational hygienists and managers that determine the permissible limits of exposure to heat. These findings of the effects of exposure to warm air conditions on HR and ET are consistent with some studies' results [16, 26, 46–48]. It should be noted that the use of ET as a relatively reliable indicator of thermal strain is recommended by the United Kingdom Institute for Occupational Medicine for the Health and Safety Executive in accordance with the standard measurement method [49].

As displayed in Table 4, after ambient air temperature,  $VO_2$  max had a significant effect on the HR of the participants. As presented in Fig 3, participants with a higher  $VO_2$  max had a slower HR when exposed to warm air condition. Lisman et al. indicated that  $VO_2$  max was also the most influential factor in HR and core body temperature during the heat tolerance test [26]. According to the results of the LMM model (Table 4),  $VO_2$  max did not significantly affect ET. Nonetheless, as demonstrated by Fig 4, the difference in ET before and after walking on a treadmill in the warm air condition was significantly negatively correlated with  $VO_2$  max. In other words, participants with higher aerobic capacity had lower body temperatures. Coso et al. reported that heat dissipation exceeds heat accumulation in people with higher aerobic capacity engaged in exercises with the same intensity [50]. Lu et al. demonstrated that the  $VO_2$  max was influential in the physiological response to the warm air condition [16]. It seems that the considered exposure time (30 minutes) is not enough to make some remarkable ear temperature responses in the warm air condition compared with the heart rate responses. Due to the possibility of missing the participants in longer exposures, 30 minutes of exposure was considered in each experimental session. Moreover, it can be seen that the heart rate might be a generally more sensitive indicator than body temperature to incremental changes in air temperature.

According to the results of the LMM model, body fat mass significantly affected the HR of the participants. In this regard, participants with a higher body fat mass had a higher HR. In agreement with our findings, Dehghan et al. reported that the intensity of heat strain was higher in overweight workers [51]. Lu et al. also reported that body surface area and fat percentage were influential in the physiological response to heat [16].

The measuring of physiological responses in the warm air condition showed that none of the physiological responses significantly differed based on BMI. However, descriptive results indicated that participants with normal BMI have a higher aerobic capacity, lower fat percentage, and higher heat tolerance than those with abnormal BMI. Most participants in the present study had normal BMI, so there was no significant difference in physiological responses based on BMI. It is proposed that a broader variation in BMI distribution for a more comprehensive study.

It is observed that there was no significant difference between urinary density in thermoneutral and warm conditions (Table 2). However, as shown in Fig 5, participants with higher

aerobic capacity had lower urine density in the warm air condition. Since urine density is considered an indicator of hydration status [42], participants with higher aerobic capacity had better hydration. Batista et al. demonstrated that hydration was influential in the aerobic capacity of athletes [52]. It should be noted that urine-specific gravity is widely accepted as a convenient and reliable indicator of hydration status. However, two thermal air conditions considered in this study cannot affect participant hydration status significantly.

The current finding showed that the developed linear mixed model accurately estimates body heat tolerance with different influential risk factors. It can be a helpful screening tool for properly selecting workers in occupational medical examinations for working in warm air conditions. However, the domain of this analysis model is restricted to a defined air temperature range. The air temperature range was selected based on thermal air conditions of the typical real warm metal industry. However, some physiological responses did not show considerable variations in this climatic condition. This model can be expanded for warmer to hot air conditions of the typical working environment.

Future studies can also investigate the effect of the aerobic capacity of workers on other sensitive physiological responses such as heart rate variability, urine osmolality, and sweat characteristics in similar thermal condition of the current study. The present study was based on short-term exposure to thermal conditions while working hours are longer in the real world. The possibility of conducting a field study under controlled other environmental conditions is limited. Hence, field studies with long-term exposure to the same thermal conditions are recommended to verify these findings.

## 5 Conclusions

The analysis model for body heat tolerance verified that individual characteristics of workers as aerobic and physical fitness, have a critical role in reducing physiological strain in warm environments. Improving the workers' aerobic capacity through regular exercise programs and lifestyle modifications can strengthen body heat tolerance. The selection of workers with good aerobic fitness during an occupational medical examination for working in warm air conditions will mitigate the risk of heat-related illness.

## Supporting information

**S1 Data.**  
(XLSX)

## Acknowledgments

The authors would like to express their sincere gratitude for the active cooperation and participation of the metal industry workers.

## Author Contributions

**Conceptualization:** Mohsen Aliabadi, Masoud Shafiee Motlagh, Rostam Golmohammadi, Rashid Heidarimoghadam.

**Data curation:** Mohsen Aliabadi, Masoud Shafiee Motlagh, Maryam Farhadian.

**Formal analysis:** Mohsen Aliabadi, Masoud Shafiee Motlagh, Maryam Farhadian.

**Investigation:** Mohsen Aliabadi, Masoud Shafiee Motlagh, Rostam Golmohammadi.

**Methodology:** Mohsen Aliabadi, Masoud Shafiee Motlagh.

**Project administration:** Mohsen Aliabadi, Masoud Shafiee Motlagh.

**Supervision:** Mohsen Aliabadi, Rostam Golmohammadi, Rashid Heidaramoghdam.

**Validation:** Mohsen Aliabadi, Masoud Shafiee Motlagh.

**Visualization:** Mohsen Aliabadi, Rostam Golmohammadi.

**Writing – original draft:** Mohsen Aliabadi, Masoud Shafiee Motlagh.

**Writing – review & editing:** Mohsen Aliabadi, Masoud Shafiee Motlagh, Rostam Golmohammadi.

## References

1. Hikmat Ramdhan D, Ulfah Aisyah Indriani NF, Puspita N. Effect of Heat Stress on Body Weight, Blood Pressure, and Urine Specific Gravity among Underground Miners in PT X 2015. *KnE Life Sci.* 2018; 4: 434. <https://doi.org/10.18502/kls.v4i4.2304>
2. Dubé P-A, Imbeau D, Dubeau D, Auger I. Worker heat stress prevention and work metabolism estimation: comparing two assessment methods of the heart rate thermal component. *Ergonomics.* 2019; 62: 1066–1085. <https://doi.org/10.1080/00140139.2019.1588386> PMID: 30961471
3. Parsons K. Human thermal environments: the effects of hot, moderate, and cold environments on human health, comfort, and performance. CRC press; 2014.
4. Itani M, Ghaddar N, Ghali K, Laouadi A. Bioheat modeling of elderly and young for prediction of physiological and thermal responses in heat-stressful conditions. *J Therm Biol.* 2020; 88: 102533. <https://doi.org/10.1016/j.jtherbio.2020.102533> PMID: 32125972
5. Mohebian Z, Mehrifar Y, Dehghan H, Habibi E, Yadegarfar G. Investigating the combined effects of heat and lighting on students reaction time in laboratory condition. *J Occup Hyg Eng.* 2016; 3: 40–46. <https://doi.org/10.21859/johe-03035>
6. Al Refaie AM, Alashwal AM, Abdul-Samad Z, Salleh H. Weather and labor productivity in construction: a literature review and taxonomy of studies. *Int J Product Perform Manag.* 2020; ahead-of-p. <https://doi.org/10.1108/IJPPM-12-2019-0577>
7. Kjellstrom T, Briggs D, Freyberg C, Lemke B, Otto M, Hyatt O. Heat, Human Performance, and Occupational Health: A Key Issue for the Assessment of Global Climate Change Impacts. *Annu Rev Public Health.* 2016; 37: 97–112. <https://doi.org/10.1146/annurev-publhealth-032315-021740> PMID: 26989826
8. Kjellstrom T, Kovats RS, Lloyd SJ, Holt T, Tol RSJ. The Direct Impact of Climate Change on Regional Labor Productivity. *Arch Environ Occup Health.* 2009; 64: 217–227. <https://doi.org/10.1080/19338240903352776> PMID: 20007118
9. Hemmatjo R, Motamedzade M, Aliabadi M, Kalatpour O, Farhadian M. The effects of multiple firefighting activities on information processing and work performance in a smoke-diving room: An intervention study. *Hum Factors Ergon Manuf.* 2017; 27: 261–267. <https://doi.org/10.1002/hfm.20709>
10. Mazlomi A, Golbabaie F, Farhang Dehghan S, Abbasinia M, Mahmoud Khani S, Ansari M, et al. The influence of occupational heat exposure on cognitive performance and blood level of stress hormones: a field study report. *Int J Occup Saf Ergon.* 2017; 23: 431–439. <https://doi.org/10.1080/10803548.2016.1251137> PMID: 27852154
11. Petitti DB, Harlan SL, Chowell-Puente G, Ruddell D. Occupation and Environmental Heat-Associated Deaths in Maricopa County, Arizona: A Case-Control Study. *PLoS One.* 2013; 8. <https://doi.org/10.1371/journal.pone.0062596> PMID: 23734174
12. Giah O, Darvishi E, Aliabadi M, Khoubi J. The efficacy of radiant heat controls on workers' heat stress around the blast furnace of a steel industry. *Work.* 2016; 53: 293–298. <https://doi.org/10.3233/WOR-152104> PMID: 26409350
13. Sobolewski A, Młynarczyk M, Konarska M, Bugajska J. Effect of previous lowering of skin temperature on the time of safe exposure to a hot environment: a case study. *Int J Occup Saf Ergon.* 2021; 27: 237–246. <https://doi.org/10.1080/10803548.2019.1701305> PMID: 31825289
14. Sobolewski A, Młynarczyk M, Konarska M, Bugajska J. The influence of air humidity on human heat stress in a hot environment. *Int J Occup Saf Ergon.* 2021; 27: 226–236. <https://doi.org/10.1080/10803548.2019.1699728> PMID: 31779525
15. Foster J, Hodder SG, Lloyd AB, Havenith G. Individual Responses to Heat Stress: Implications for Hyperthermia and Physical Work Capacity. *Front Physiol.* 2020; 11. <https://doi.org/10.3389/fphys.2020.541483> PMID: 33013476

16. Lu S, Peng H, Gao P. A Body Characteristic Index to Evaluate the Level of Risk of Heat Strain for a Group of Workers With a Test. *Int J Occup Saf Ergon*. 2014; 20: 647–659. <https://doi.org/10.1080/10803548.2014.11077074> PMID: 25513800
17. Siconolfi SF, Cullinane EM, Carleton RA, Thompson PD. Assessing VO<sub>2</sub>max in epidemiologic studies: modification of the Astrand-Rhyming test. *Med Sci Sports Exerc*. 1982; 14: 335–338. PMID: 7154887
18. Saltin B, Calbet JAL. Point: in health and in a normoxic environment, VO<sub>2</sub> max is limited primarily by cardiac output and locomotor muscle blood flow. *J Appl Physiol*. 2006; 100: 744–748. <https://doi.org/10.1152/jappphysiol.01395.2005> PMID: 16421282
19. Nyberg LA, Sundberg CJ, Wändell P, Kowalski J, Hellénus M-L. Long-term effects of group exercise intervention on maximal step-up height in middle-aged female primary care patients with obesity and other cardio-metabolic risk factors. *BMC Sports Sci Med Rehabil*. 2020; 12: 11. <https://doi.org/10.1186/s13102-020-00161-4> PMID: 32190332
20. Shenoy S, Tyagi BS, Sandhu JS. Concurrent validity of the non-exercise based VO<sub>2</sub>max prediction equation using percentage body fat as a variable in asian Indian adults. *Sport Med Arthrosc Rehabil Ther Technol*. 2012; 4: 34. <https://doi.org/10.1186/1758-2555-4-34> PMID: 22998672
21. Moran DS, Erlich T, Epstein Y. The Heat Tolerance Test: An Efficient Screening Tool for Evaluating Susceptibility to Heat. *J Sport Rehabil*. 2007; 16: 215–221. <https://doi.org/10.1123/jsr.16.3.215> PMID: 17923727
22. Palejwala Z, Wallman K, Ward M, Yam C, Maroni T, Parker S, et al. Effects of a hot ambient operating theatre on manual dexterity, psychological and physiological parameters in staff during a simulated burn surgery. Kamolz L-P, editor. *PLoS One*. 2019; 14: e0222923. <https://doi.org/10.1371/journal.pone.0222923> PMID: 31618241
23. Mohr M, Nybo L, Grantham J, Racinais S. Physiological responses and physical performance during football in the heat. *PLoS One*. 2012; 7. <https://doi.org/10.1371/journal.pone.0039202> PMID: 22723963
24. Silva RPM, Barros CLM, Mendes TT, Garcia ES, Valenti VE, de Abreu LC, et al. Correction: The influence of a hot environment on physiological stress responses in exercise until exhaustion. *PLoS One*. 2019; 14: e0214627. <https://doi.org/10.1371/journal.pone.0214627> PMID: 30908551
25. Havenith G, Coenen JML, Kistemaker L, Kenney WL. Relevance of individual characteristics for human heat stress response is dependent on exercise intensity and climate type. *Eur J Appl Physiol*. 1998; 77: 231–241. <https://doi.org/10.1007/s004210050327> PMID: 9535584
26. Lisman P, Kazman JB, O'Connor FG, Heled Y, Deuster PA. Heat Tolerance Testing: Association Between Heat Intolerance and Anthropometric and Fitness Measurements. *Mil Med*. 2014; 179: 1339–1346. <https://doi.org/10.7205/MILMED-D-14-00169> PMID: 25373064
27. Mee JA, Doust J, Maxwell NS. Repeatability of a running heat tolerance test. *J Therm Biol*. 2015; 49–50: 91–97. <https://doi.org/10.1016/j.jtherbio.2015.02.010> PMID: 25774031
28. Jay O, Bain AR, Deren TM, Sacheli M, Cramer MN. Large differences in peak oxygen uptake do not independently alter changes in core temperature and sweating during exercise. *Am J Physiol Integr Comp Physiol*. 2011; 301: R832–R841. <https://doi.org/10.1152/ajpregu.00257.2011> PMID: 21697517
29. Alele FO, Malau-Aduli BS, Malau-Aduli AEO, J. Crowe M. Individual Anthropometric, Aerobic Capacity and Demographic Characteristics as Predictors of Heat Intolerance in Military Populations. *Medicina (B Aires)*. 2021; 57: 173. <https://doi.org/10.3390/medicina57020173> PMID: 33671414
30. Peretz C, Goren A, Smid T, Kromhout H. Application of Mixed-effects Models for Exposure Assessment. *Ann Occup Hyg*. 2002; 46: 69–77. <https://doi.org/10.1093/annhyg/mef009> PMID: 12005135
31. Magezi DA. Linear mixed-effects models for within-participant psychology experiments: an introductory tutorial and free, graphical user interface (LMMgui). *Front Psychol*. 2015; 6: 1–7. <https://doi.org/10.3389/fpsyg.2015.00002> PMID: 25657634
32. Havenith G. Individualized model of human thermoregulation for the simulation of heat stress response. *J Appl Physiol*. 2001; 90: 1943–1954. <https://doi.org/10.1152/jappl.2001.90.5.1943> PMID: 11299289
33. Richmond VL, Davey S, Griggs K, Havenith G. Prediction of Core Body Temperature from Multiple Variables. *Ann Occup Hyg*. 2015; 59: 1168–1178. <https://doi.org/10.1093/annhyg/mev054> PMID: 26268995
34. Meteyard L, Davies RAI. Best practice guidance for linear mixed-effects models in psychological science. *J Mem Lang*. 2020; 112: 104092. <https://doi.org/10.1016/j.jml.2020.104092>
35. Katić K, Li R, Zeiler W. Thermophysiological models and their applications: A review. *Build Environ*. 2016; 106: 286–300. <https://doi.org/10.1016/j.buildenv.2016.06.031>
36. Rom WN, Markowitz SB. *Environmental and occupational medicine*. Lippincott Williams & Wilkins; 2007.
37. ISO 9886:2004 Ergonomics—Evaluation of thermal strain by physiological measurements.



38. ISO 8996:2004 Ergonomics of the thermal environment—Determination of metabolic rate.
39. ISO 9920:2007 Ergonomics of the thermal environment—Estimation of thermal insulation and water vapour resistance of a clothing ensemble.
40. ACSM's guidelines for exercise testing and prescription. 9 ed: American College of Sport Medicine. Lippincott Williams & Wilkins; 2013. pp. 7–73.
41. Bates GP, Miller VS, Joubert DM. Hydration status of expatriate manual workers during summer in the Middle East. *Ann Occup Hyg*. 2010; 54: 137–143. <https://doi.org/10.1093/annhyg/mep076> PMID: 19959561
42. Barley OR, Chapman DW, Abbiss CR. Reviewing the current methods of assessing hydration in athletes. *J Int Soc Sports Nutr*. 2020; 17: 52. <https://doi.org/10.1186/s12970-020-00381-6> PMID: 33126891
43. Bolghanabadi S, Pour M, Mohamadi AA, Tizro M. The Relationship between Heat Strain and Hydration Status among Workers in a Sugar Factory. *J Occup Hyg Eng*. 2016; 3: 16–23. <https://doi.org/10.21859/johe-03032>
44. Piil JF, Lundbye-Jensen J, Christiansen L, Ioannou L, Tsoutsoubi L, Dallas CN, et al. High prevalence of hypohydration in occupations with heat stress—Perspectives for performance in combined cognitive and motor tasks. Sunderland C, editor. *PLoS One*. 2018; 13: e0205321. <https://doi.org/10.1371/journal.pone.0205321> PMID: 30356308
45. Pecoraro V, Petri D, Costantino G, Squizzato A, Moja L, Virgili G, et al. The diagnostic accuracy of digital, infrared and mercury-in-glass thermometers in measuring body temperature: a systematic review and network meta-analysis. *Intern Emerg Med*. 2020. <https://doi.org/10.1007/s11739-020-02556-0> PMID: 33237494
46. Golbabaee F, Zakerian SA, Fouladi Dehaghi B, Ibrahim Ghavamabadi L, Gharagozlou F, Mirzaei Alia-badi M, et al. Heat stress and physical capacity: A case study of semi-professional footballers. *Iran J Public Health*. 2014; 43: 355–361. PMID: 25988096
47. Wong DP, Chung JW, Chan AP, Wong FK, Yi W. Comparing the physiological and perceptual responses of construction workers (bar benders and bar fixers) in a hot environment. *Appl Ergon*. 2014; 45: 1705–1711. <https://doi.org/10.1016/j.apergo.2014.06.002> PMID: 24980679
48. Nkurikiyeyezu KN, Suzuki Y, Lopez GF. Heart rate variability as a predictive biomarker of thermal comfort. *J Ambient Intell Humaniz Comput*. 2018; 9: 1465–1477. <https://doi.org/10.1007/s12652-017-0567-4>
49. Institute for Occupational Medicine for Health and Safety Executive. Report RR989, The use of infrared (tympanic) temperature as a guide to signs of the heat stress in industry. London; 2013.
50. Del Coso J, Hamouti N, Ortega JF, Fernández-Elías VE, Mora-Rodríguez R. Relevance of individual characteristics for thermoregulation during exercise in a hot-dry environment. *Eur J Appl Physiol*. 2011; 111: 2173–2181. <https://doi.org/10.1007/s00421-011-1847-x> PMID: 21305382
51. Dehghan H, Mortazavi SB, Jafari MJ, Maracy MR. Cardiac strain between normal weight and overweight workers in hot/humid weather in the Persian Gulf. *Int J Prev Med*. 2013; 4: 1147. PMID: 24319554
52. Batista MCC, dos Santos MAP. Impact of Hydration on Exercise Performance and Physiological Responses. *Curr Nutr Food Sci*. 2020; 16: 1346–1352. <https://doi.org/10.2174/1573401316666200309113907>
